# Supplementary material for: Molecular Phylogeny and Morphology Reveal Cryptic Species in the Cordyceps militaris Complex from Vietnam
Source: MDPI journal article supplement (doi:10.3390/jof9060676), 2023-06-15
Supplement: s1 [file s1]

**Table S1. Primers used in the study.**

| Gene         | Primer name      | Primer sequence (5'-3') | Reference |
|--------------|------------------|-------------------------|-----------|
| <i>nrSSU</i> | nrSSU-CoF        | TCTCAAAGATTAAGCCATGC    | [16]      |
|              | nrSSU-CoR        | TCACCAACGGAGACCTTG      |           |
| <i>nrLSU</i> | LR5              | ATCCTGAGGGAACTTC        | [17,18]   |
|              | LR0R             | GTACCCGCTGAACTTAAGC     |           |
| <i>TEF</i>   | EF1 $\alpha$ -EF | GCTCCYGGHCAYCGTGAYTTYAT | [12,19]   |
|              | EF1 $\alpha$ -ER | ATGACACCRACRGCRACRGTYTG |           |
| <i>RPB1</i>  | RPB1-5'F         | CAYCCWGGYTTYATCAAGAA    | [12,19]   |
|              | RPB1-5'R         | CCNGCDATNTCRTTRTCCATRTA |           |
| <i>RPB2</i>  | RPB2-5'F         | CCCATRGCTTGTYRCCCAT     | [12,19]   |
|              | RPB2-5'R         | GAYGAYMGWGATCAYTTYGG    |           |
